# Supplementary material for: Vimentin protects differentiating stem cells from stress
Source: PubMed Central journal article supplement (PMC7658978; doi:10.1038/s41598-020-76076-4), 2020-11-11

## Supplementary material

### Vimentin protects differentiating stem cells from stress

Sundararaghavan Pattabiraman<sup>1</sup>, Gajendra Kumar Azad<sup>2,4</sup>, Triana Amen<sup>1</sup>, Shlomi Brielle<sup>1</sup>, Jung Eun Park<sup>5</sup>, Siu Kwan Sze<sup>5</sup>, Eran Meshorer<sup>2,3</sup>, and Daniel Kaganovich<sup>1</sup>

1. Department of Experimental Neurodegeneration, University Medical Center Göttingen, Waldweg 33, 37073 Göttingen, Germany
2. Department of Genetics, The Institute of Life Sciences, The Hebrew University of Jerusalem, Edmond J. Safra Campus, Jerusalem 91904, Israel
3. The Edmond and Lily Safra Center for Brain Research (ELSC), The Hebrew University of Jerusalem, Edmond J. Safra Campus, Jerusalem 91904, Israel
4. Current address: Department of Zoology, Patna University, Patna 800005, India
5. School of Biological Sciences, Nanyang Technological University, 60 Nanyang Drive, Singapore 637551, Singapore

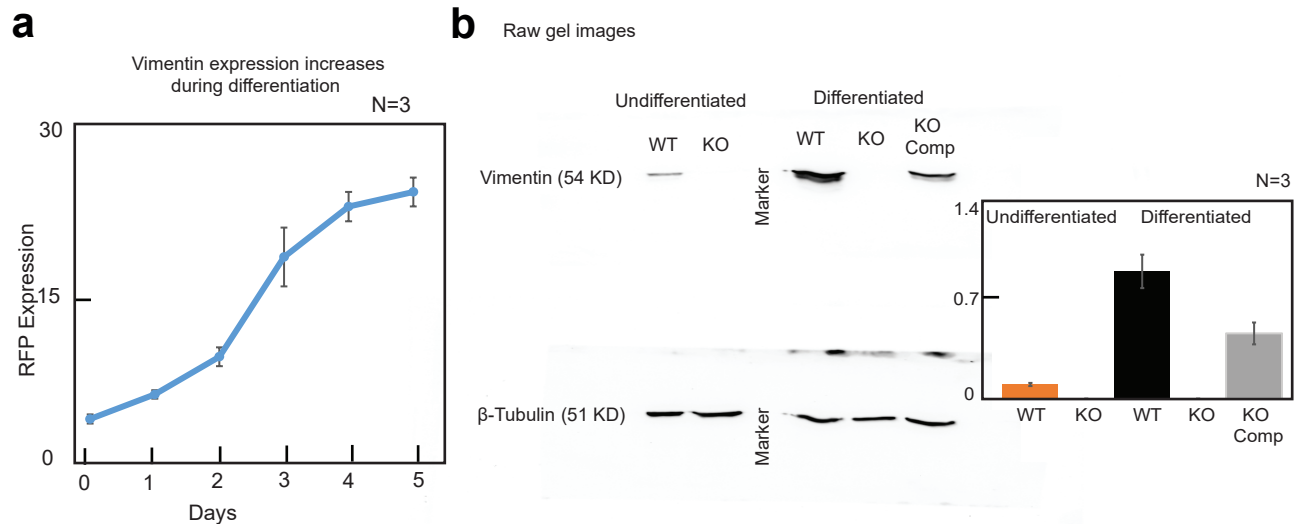

**c** Confirmation by genomic DNA sequencing

**WT**  
 :AGTCCTCTGCCACTCTTGCTCCGGGACCCAGAGACCCAGCGCTCCTACGATTCACAGCCACCGGCCCTCATTCCCTTGTTCAGTTTTTCCA  
 GCCGCAGCAAGCCAGCCACCTTCGAAGCCATGCTTACCAGGTCTGTGTCTCGTCTCCTACCGCAGGATGTTCCGGTGGCTCCGGCACATCGA  
 GCCGGCCAGCTCCAACCGGAGCTATGTGACCAGTCCACACGCACCTACAGTCTGGGCAGCGCACTGCCCCAGCACTAGCCGCAGCCTCT  
 ATTCTCATCCCCGGTGGCGCTATGTGACCCGGTCTCGGCA GTGCGCCTGCGGAGCAGCGTCCCGGGCGTGGCGGTGCTTCAAGACTCGG  
 TGGACTTCTCGCTGGCCGACGCC

**KO5**  
 :AGTCCTCTGCCACTCTTGCTCCGGGACCCAGAGACCCAGCGCTCCTACGATTCACAGCCACCGGCCCTCATTCCCTTGTTCAGTTTTTCCA  
 GCCGCAGCAAGCCAGCCACCTTC-----264 nt deleted-----TCGCTGGCCGACGCC

**KO13** AGTCCTCTGCCTC-----315 nt deleted-----GTGCGCCT  
 GCGGAGCAGCGTCCCGGGCGTGGCGGTGCTTCAAGACTCGGTGGACTTCTCGCTGGCCGACGCC

**d** Confirmation by immuno-fluorescence

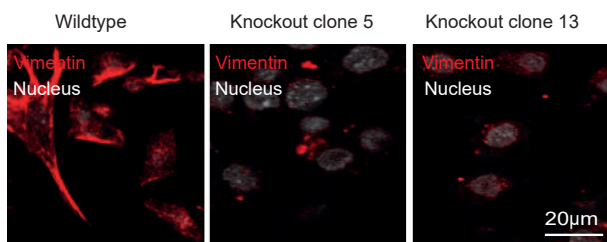

**e** Confirmation by RT-PCR

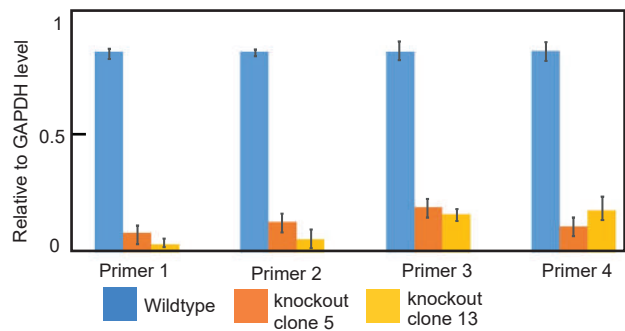

**f**

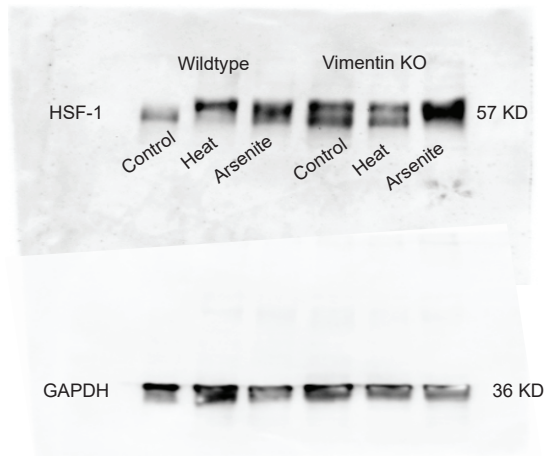

**g**

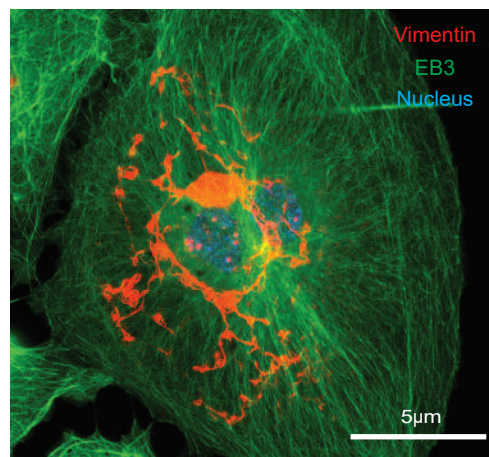

**a** Embryoid body growth at 37°C

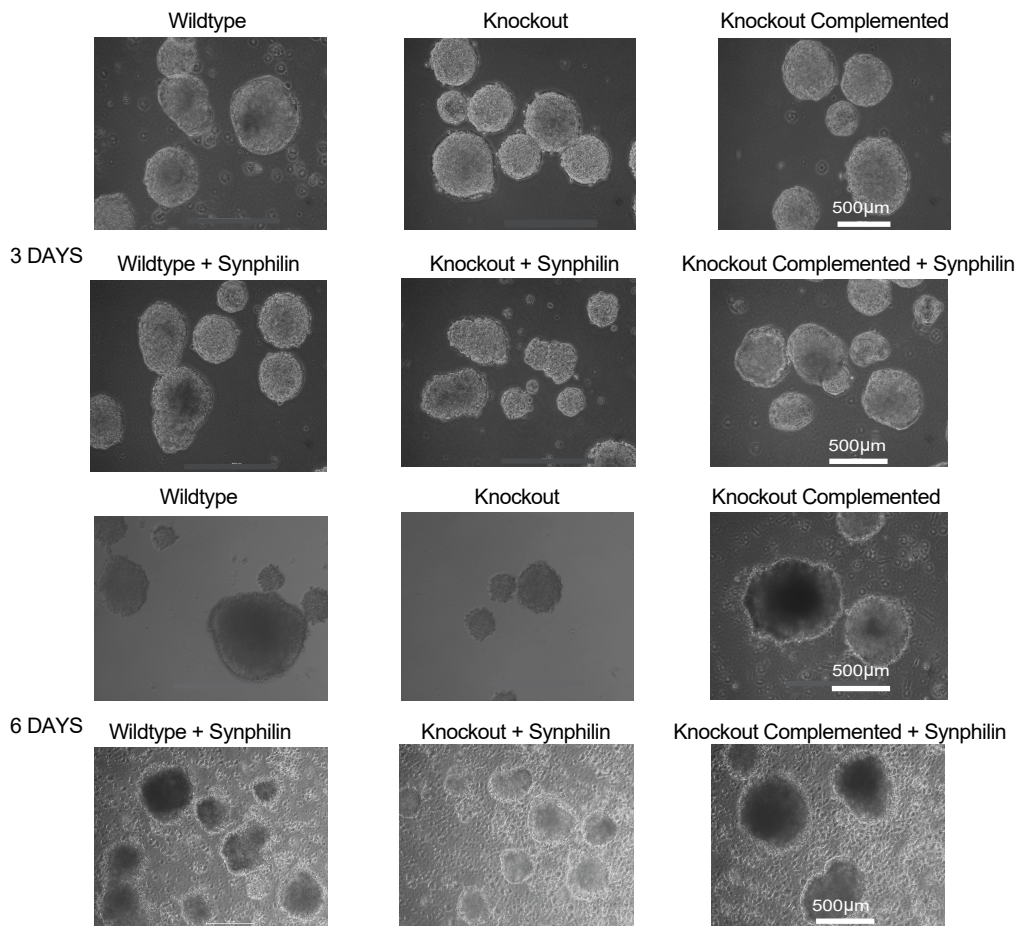

**b** Embryoid body growth at 42°C

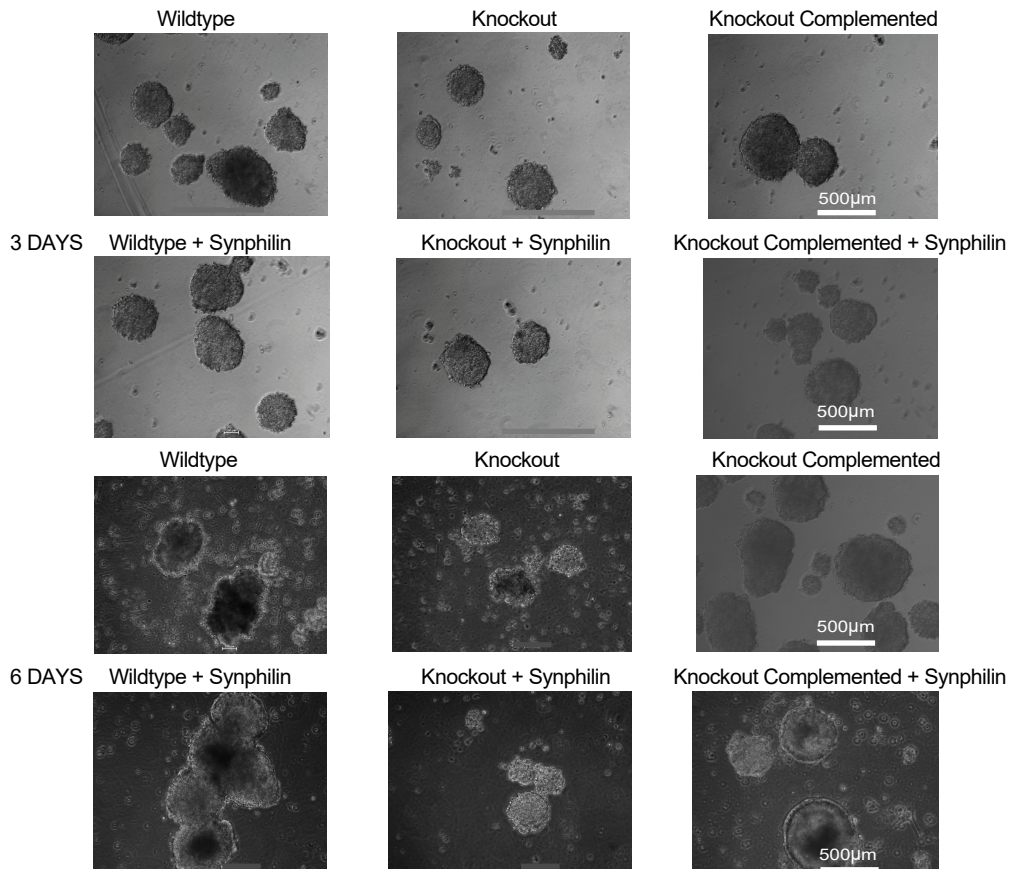

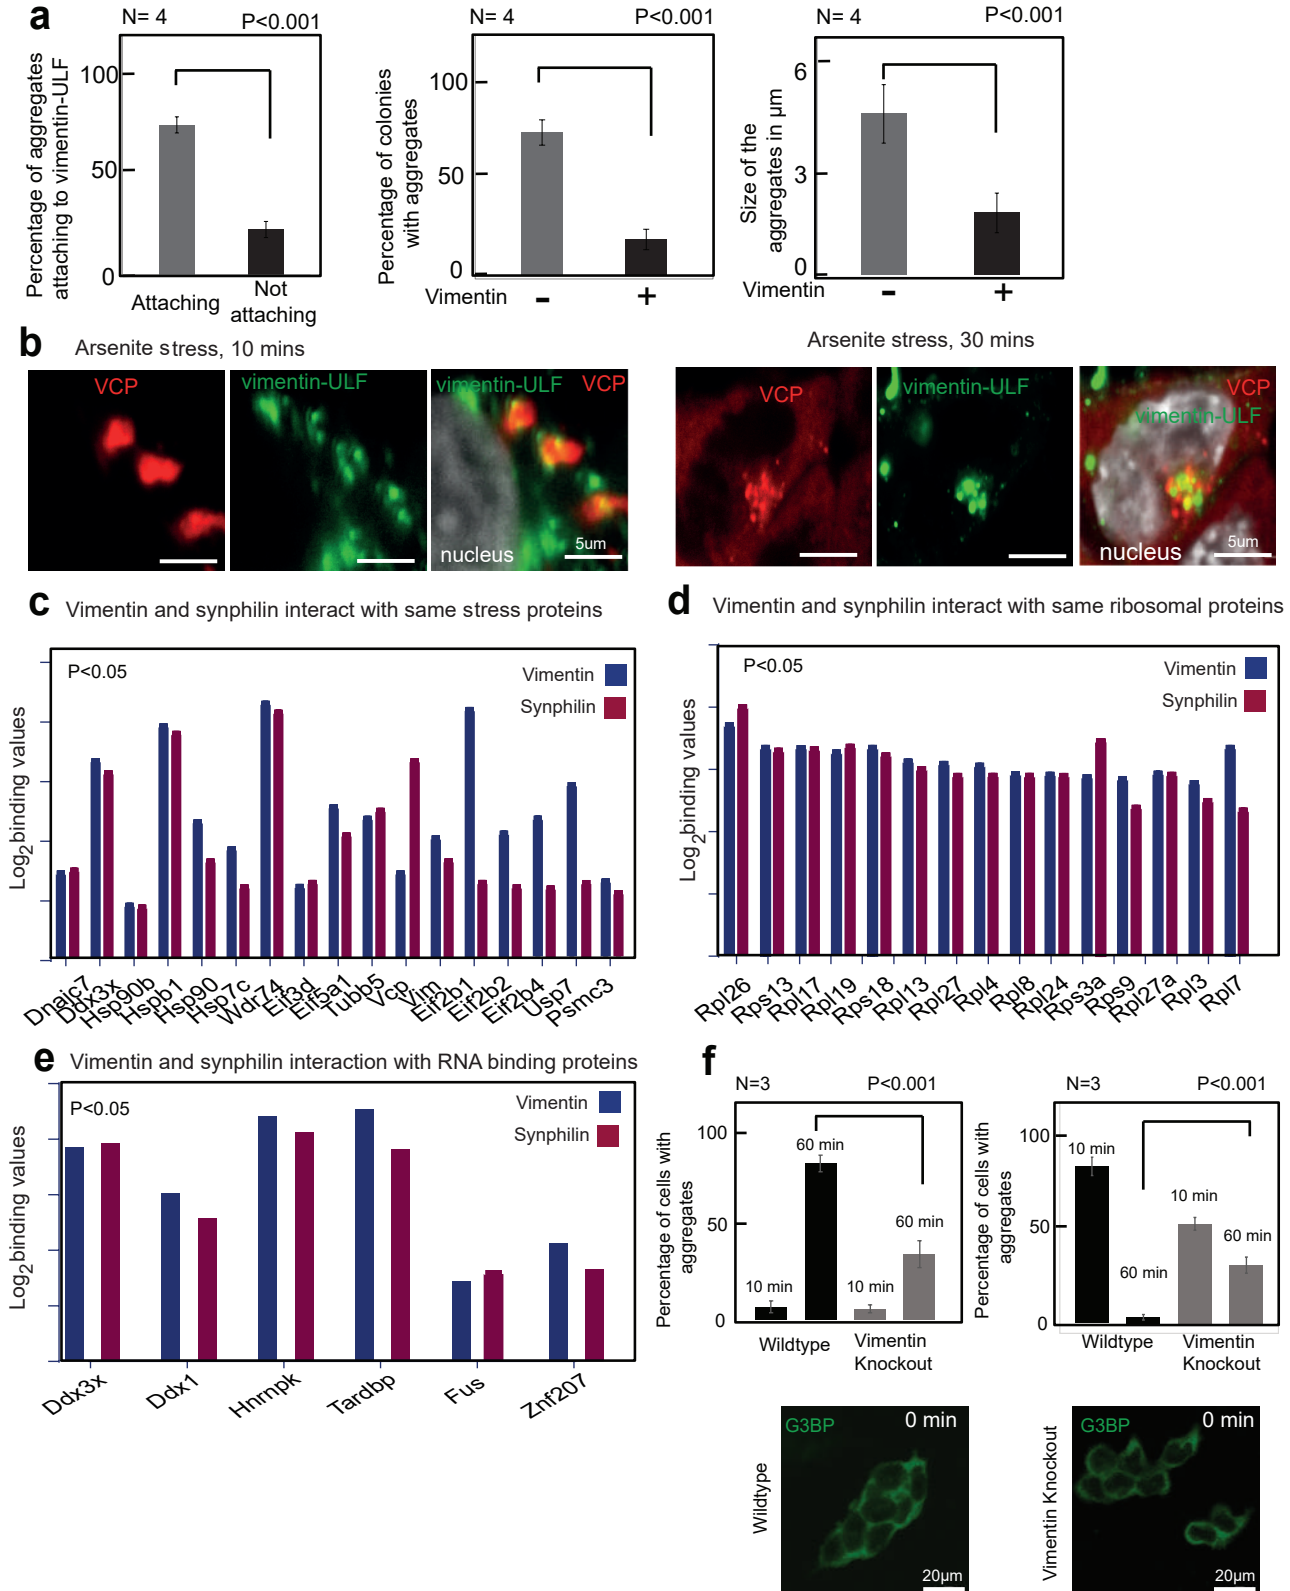

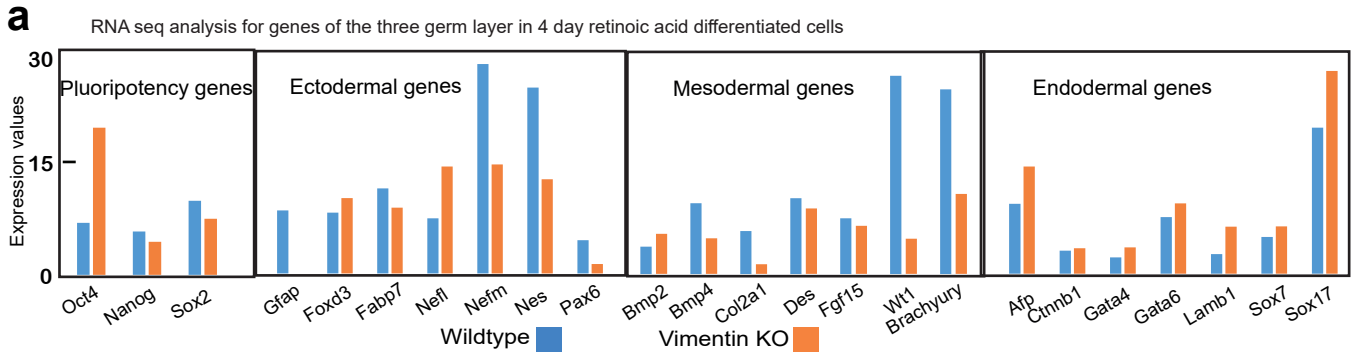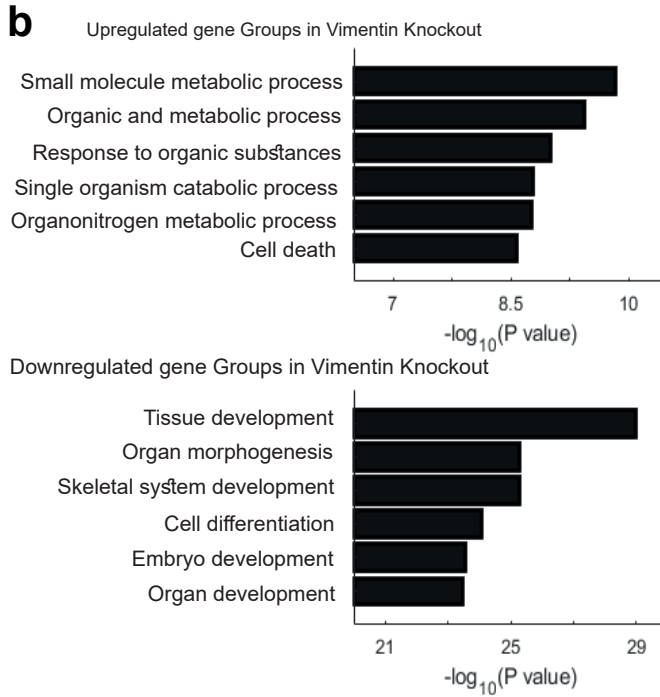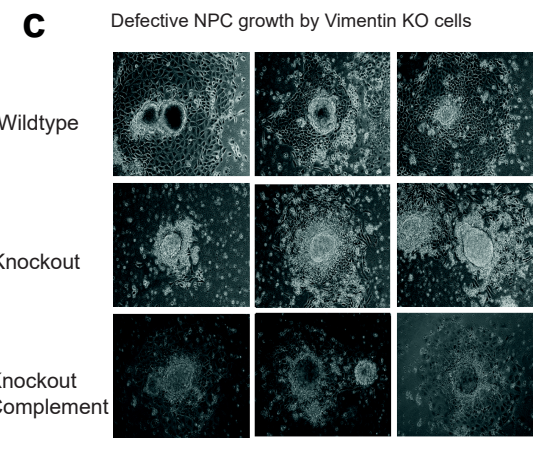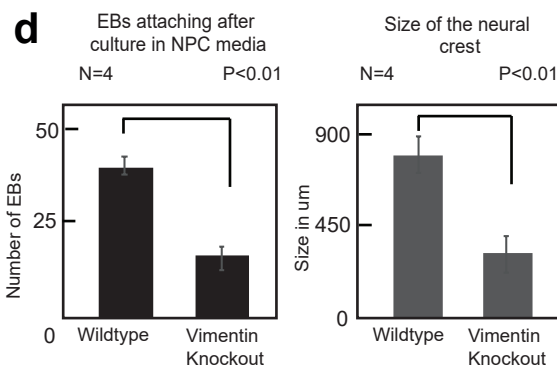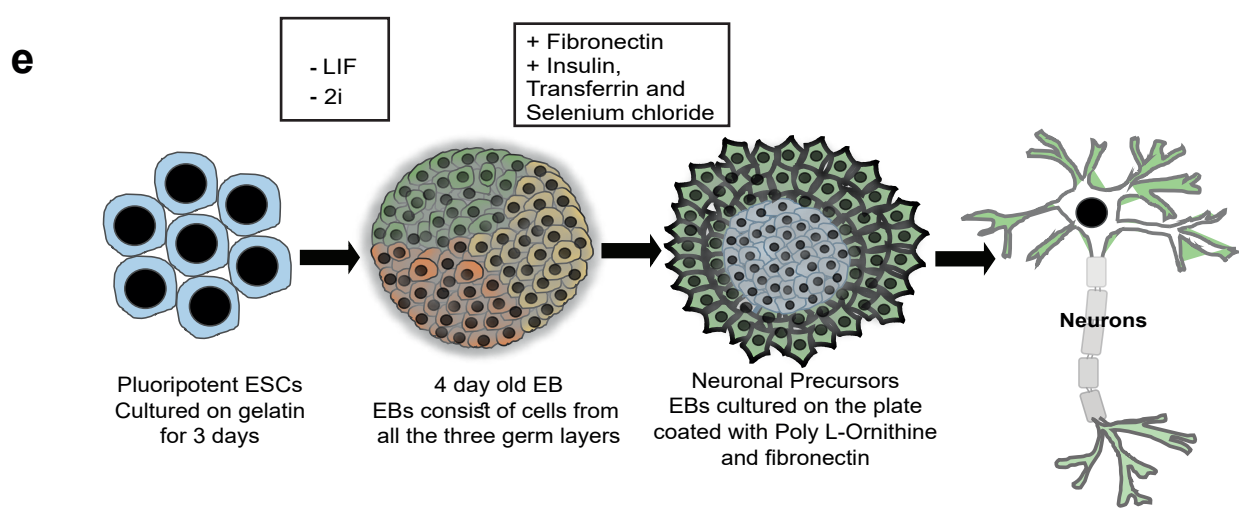

Supplement: 41598_2020_76076_MOESM2_ESM.pdf [file 41598_2020_76076_MOESM2_ESM.pdf]
